# Supplementary material for: Sandwich Enzyme-Linked Immunosorbent Assay for Quantification of Callose
Source: MDPI journal article supplement (doi:10.3390/mps5040054), 2022-06-26
Supplement: s1 [file s1]

**Supplementary Table S1:** Analysis of callose concentration in the leaves pseudostems and corms of banana plants inoculated and non-inoculated (control) with *Xcm* (Independent sample t-test,  $\alpha \leq 0.05$ ).

| Banana genotype        | Banana tissue | Treatment              | Mean callose concentration $\pm$ SD in $\mu\text{g/mL}$ (LE) | N  | Shapiro-Wilk test ( $\rho$ ) | F-test ( $\rho$ ) | t-test |    |             |
|------------------------|---------------|------------------------|--------------------------------------------------------------|----|------------------------------|-------------------|--------|----|-------------|
|                        |               |                        |                                                              |    |                              |                   | t      | df | $\rho$      |
| Mbwazirume             | Leaves        | Control                | 41.72 $\pm$ 5.64                                             | 8  | 0.1393                       | 0.08402           | 4.9520 | 12 | 0.0003353   |
|                        |               | <i>Xcm</i> -inoculated | 64.91 $\pm$ 11.66                                            | 6  | 0.5634                       |                   |        |    |             |
|                        | Pseudostems   | Control                | 1719.15 $\pm$ 341.95                                         | 9  | 0.3605                       | 0.5169            | 2.0954 | 17 | 0.05142     |
|                        |               | <i>Xcm</i> -inoculated | 2097.35 $\pm$ 433.08                                         | 10 | 0.139                        |                   |        |    |             |
|                        | Corms         | Control                | 41440.47 $\pm$ 5745.31                                       | 7  | 0.01729                      | 0.1172            | 7.2059 | 13 | 0.000006888 |
|                        |               | <i>Xcm</i> -inoculated | 82981.50 $\pm$ 14217.08                                      | 8  | 0.5637                       |                   |        |    |             |
| <i>Musa balbisiana</i> | Leaves        | Control                | 34.18 $\pm$ 4.41                                             | 6  | 0.8215                       | 0.06783           | 6.2617 | 14 | 0.00002085  |
|                        |               | <i>Xcm</i> -inoculated | 62.96 $\pm$ 10.60                                            | 10 | 0.5359                       |                   |        |    |             |
|                        | Pseudostems   | Control                | 1820.05 $\pm$ 428.92                                         | 7  | 0.2492                       | 0.6476            | 2.0771 | 13 | 0.05818     |
|                        |               | <i>Xcm</i> -inoculated | 2337.56 $\pm$ 522.21                                         | 8  | 0.4627                       |                   |        |    |             |
|                        | Corms         | Control                | 32758.00 $\pm$ 4917.78                                       | 7  | 0.3807                       | 0.1956            | 4.9106 | 14 | 0.0002297   |
|                        |               | <i>Xcm</i> -inoculated | 50612.83 $\pm$ 8541.61                                       | 9  | 0.9799                       |                   |        |    |             |
